# Supplementary material for: Structures and esterolytic reactivity of novel binuclear copper(ii) complexes with reduced l-serine Schiff bases as mimic carboxylesterases
Source: Royal Society of Chemistry journal article supplement (doi:10.1039/d0dt01823f), 2020-01-01
Supplement: d0dt01823f1.pdf [file d0dt01823f1.pdf]

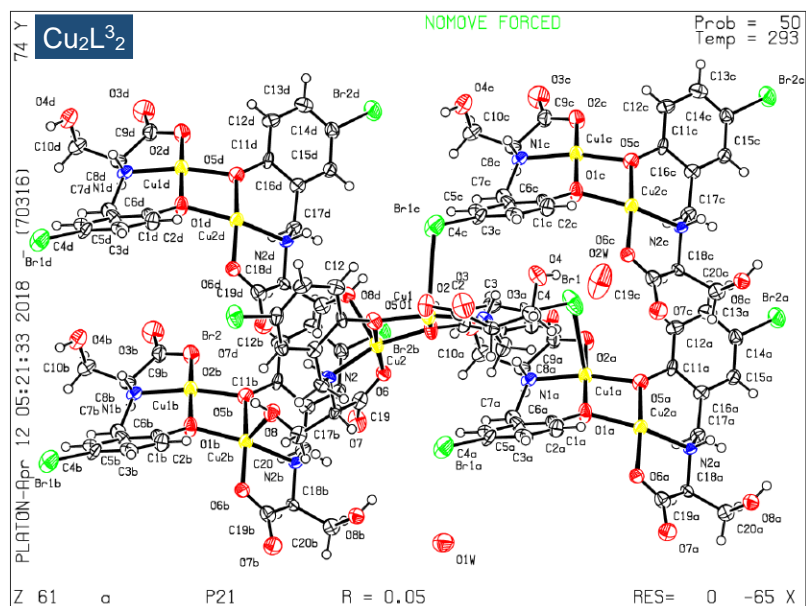

**Figure S-1.** Collected crystal structures of the two reduced L-serine Schiff bases and three binuclear copper(II) complexes with reduced L-serine Schiff bases.

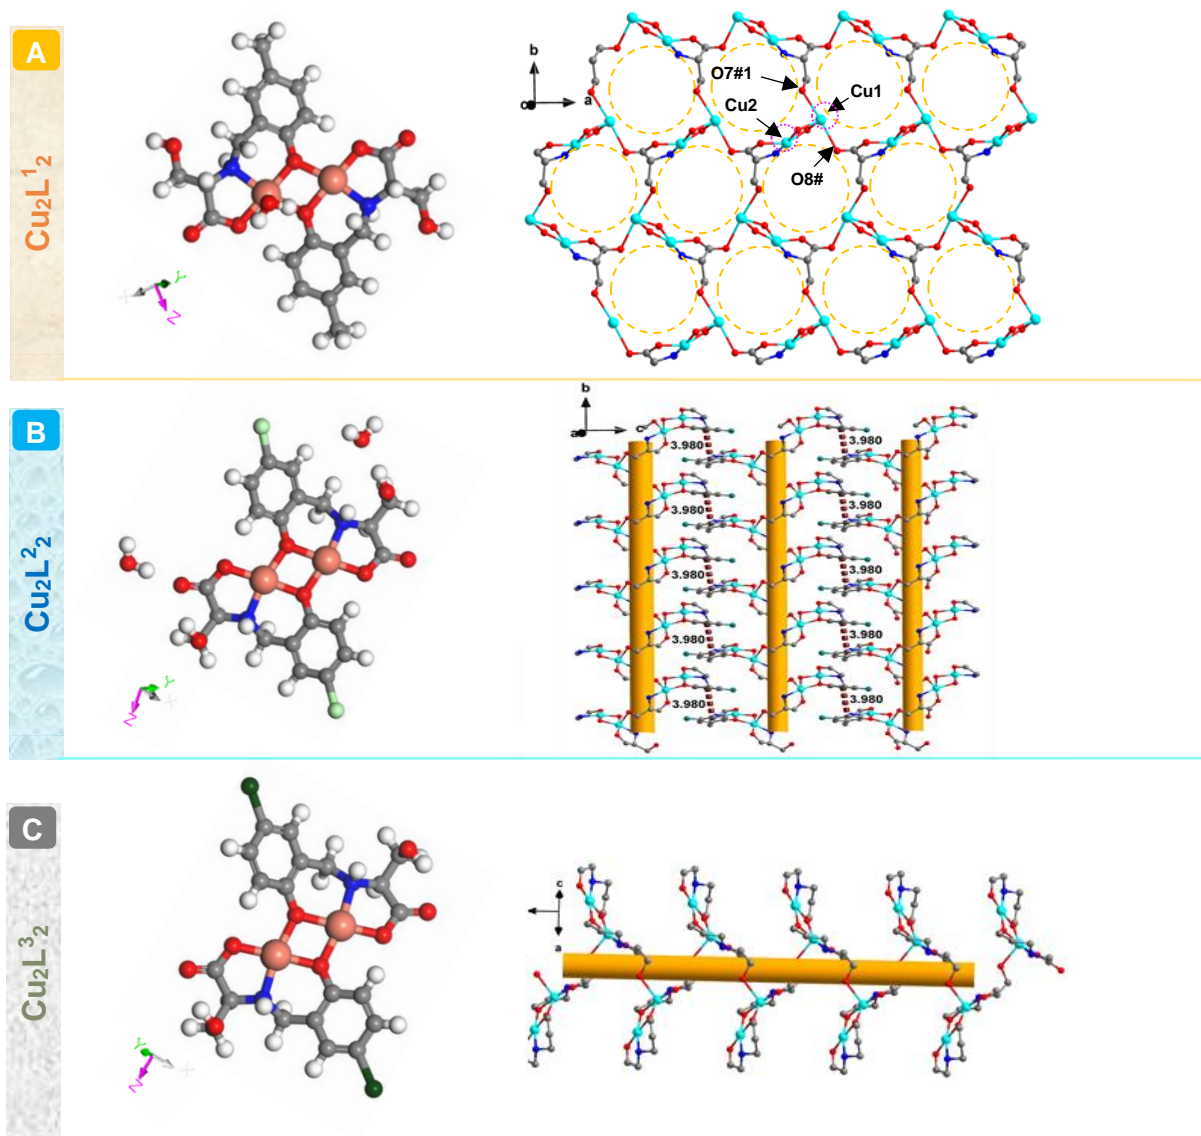

**Figure S-2.** Molecule structures (left column) and topological structures (right column) of binuclear copper(II) complexes with reduced L-serine Schiff bases.

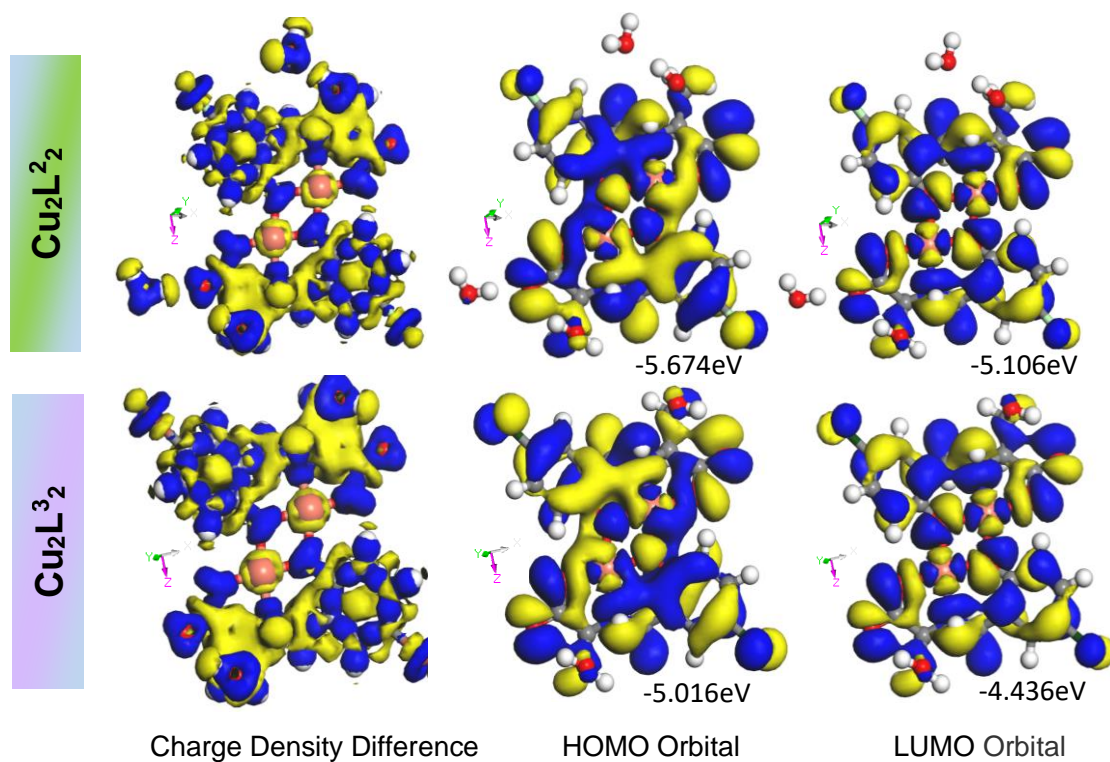

**Figure S-3.** Representations of the charge density difference (left column), HOMO (central column) and LUMO (right column) orbitals for Cu<sub>2</sub>L<sup>2</sup><sub>2</sub> and Cu<sub>2</sub>L<sup>3</sup><sub>2</sub>.

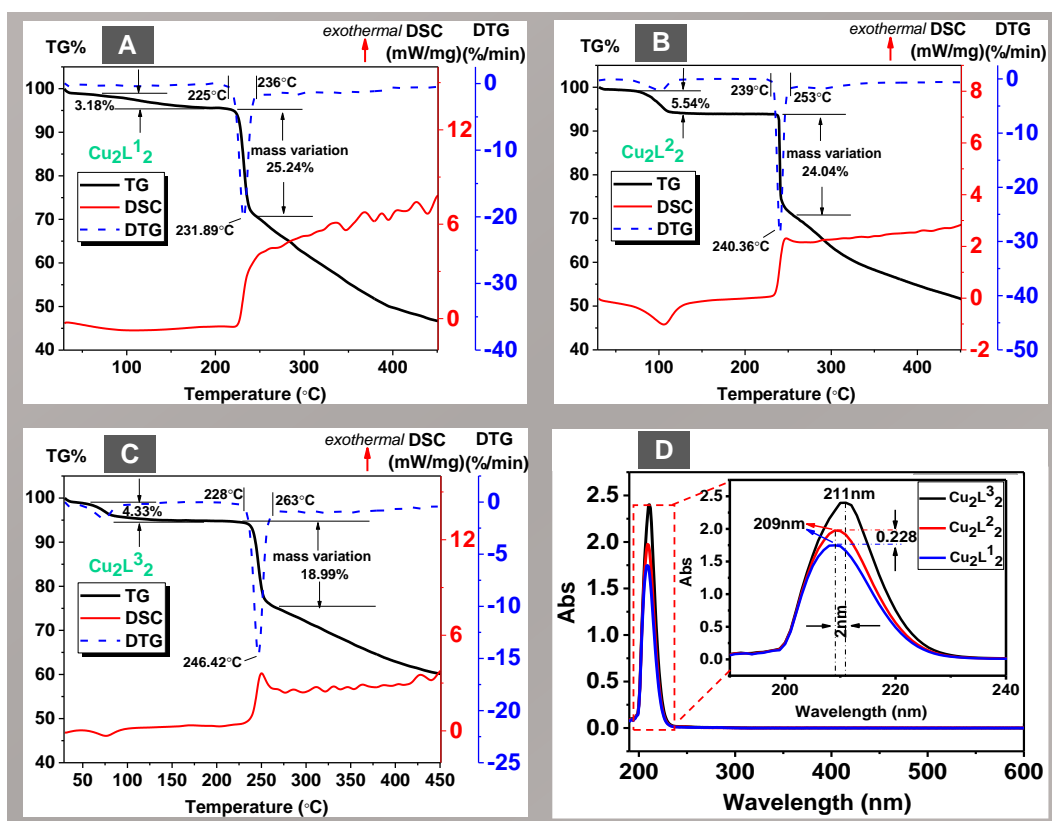

**Figure S-4.** Thermal analysis (A-C) and electronic spectra (D) of three binuclear copper(II) complexes used in this work. Thermal analysis was performed in the range of 30 °C to 451°C. Electronic spectra were recorded in buffered aqueous solution under a selected condition (25°C, pH 7.0,  $C_{\text{complex}}=6.67 \times 10^{-6} \text{ mol L}^{-1}$ ).

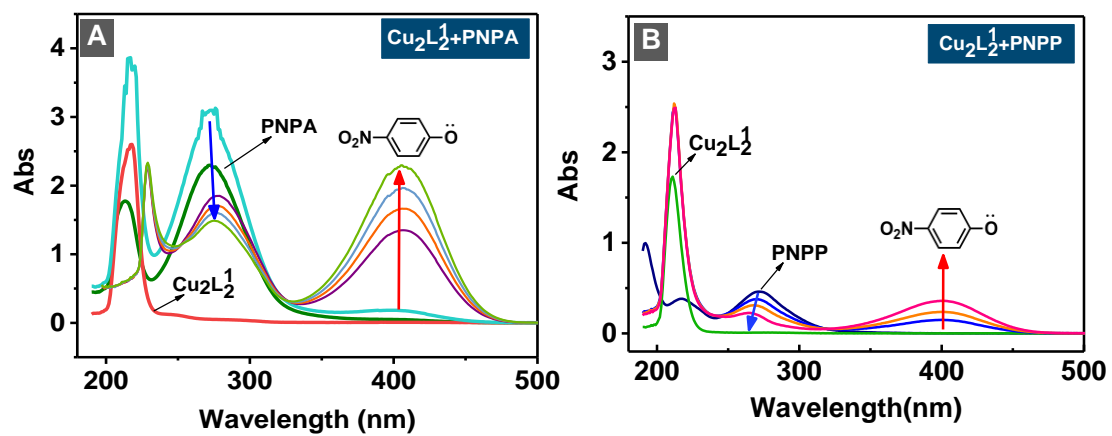

**Figure S-5.** Representative UV-vis absorbance scan for the hydrolysis of PNPA (A) and PNPP (B) by  $\text{Cu}_2\text{L}_2^1$ .

(1) PNPA+Cu<sub>2</sub>L<sub>2</sub>

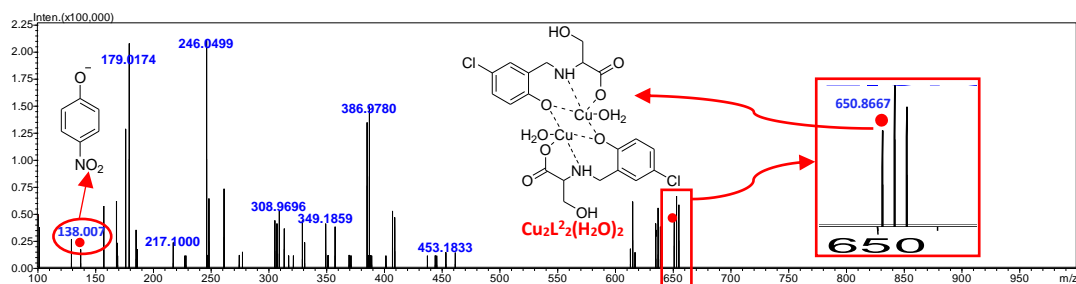

(2) PNPP+Cu<sub>2</sub>L<sub>2</sub>

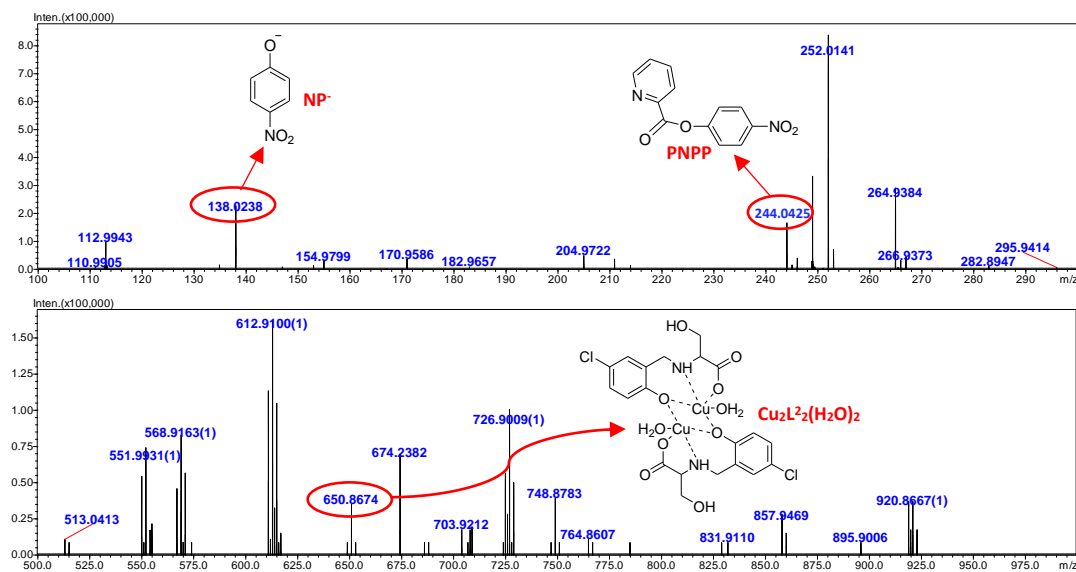

Figure S-6. ESI-MS spectra for the hydrolysis of PNPP or PNPA promoted by Cu<sub>2</sub>L<sub>2</sub>.

**Table S-1** Crystal parameters of binuclear copper(II) complexes with reduced Schiff bases

| Complex                                       | $\text{Cu}_2\text{L}^1_2$                                   | $\text{Cu}_2\text{L}^2_2$                                                 | $\text{Cu}_2\text{L}^3_2$                                                 |
|-----------------------------------------------|-------------------------------------------------------------|---------------------------------------------------------------------------|---------------------------------------------------------------------------|
| Empirical formula                             | $\text{C}_{22}\text{H}_{26}\text{Cu}_2\text{N}_2\text{O}_9$ | $\text{C}_{20}\text{H}_{24}\text{Cl}_2\text{Cu}_2\text{N}_2\text{O}_{10}$ | $\text{C}_{20}\text{H}_{20}\text{Br}_2\text{Cu}_2\text{N}_2\text{O}_{10}$ |
| Formula wt.                                   | 589.53                                                      | 650.41                                                                    | 735.28                                                                    |
| Crystal system                                | orthorhombic                                                | monoclinic                                                                | monoclinic                                                                |
| Space group                                   | P 2 <sub>1</sub> 2 <sub>1</sub> 2 <sub>1</sub> /c           | P 2 <sub>1</sub> /c                                                       | P 2 <sub>1</sub> /c                                                       |
| <i>a</i> (Å)                                  | 7.527(4)                                                    | 11.570(4)                                                                 | 11.541(6)                                                                 |
| <i>b</i> (Å)                                  | 14.125(8)                                                   | 7.832(3)                                                                  | 7.848(4)                                                                  |
| <i>c</i> (Å)                                  | 23.965(13)                                                  | 13.325(5)                                                                 | 13.547(7)                                                                 |
| $\alpha$ (deg)                                | 90.00                                                       | 90.000                                                                    | 90.000                                                                    |
| $\beta$ (deg)                                 | 90.00                                                       | 99.669                                                                    | 98.201(9)                                                                 |
| $\gamma$ (deg)                                | 90.00                                                       | 90.000                                                                    | 90.000                                                                    |
| <i>h</i> , <i>k</i> , <i>l</i> <sub>max</sub> | 8, 16, 28                                                   | 14, 10, 17                                                                | 13, 9, 16                                                                 |
| <i>V</i> (Å <sup>3</sup> )                    | 2548(2)                                                     | 1190.3(8)                                                                 | 1214.5(11)                                                                |
| $\mu$ (mm <sup>-1</sup> )                     | 1.721                                                       | 2.071                                                                     | 5.099                                                                     |
| <i>Z</i>                                      | 4                                                           | 2                                                                         | 2                                                                         |
| <i>D</i> <sub>c</sub> (g/cm <sup>3</sup> )    | 1.537                                                       | 1.540                                                                     | 2.011                                                                     |
| <i>F</i> (000)                                | 1208                                                        | 660                                                                       | 724                                                                       |
| Reflections collected                         | 4468                                                        | 4037                                                                      | 4038                                                                      |
| Reflections with <i>I</i> > 2σ ( <i>I</i> )   | 3032                                                        | 3260                                                                      | 3174                                                                      |
| <i>R</i> (int)                                | 0.0886                                                      | 0.0322                                                                    | 0.0400                                                                    |
| <i>RI</i> [ <i>I</i> > 2σ ( <i>I</i> ) ] *    | 0.0596                                                      | 0.0333                                                                    | 0.0451                                                                    |
| <i>wR2</i> [ <i>I</i> > 2σ ( <i>I</i> ) ] **  | 0.1180                                                      | 0.0702                                                                    | 0.0914                                                                    |
| <i>RI</i> (all data) *                        | 0.0985                                                      | 0.0387                                                                    | 0.0641                                                                    |
| <i>wR2</i> (all data) **                      | 0.1292                                                      | 0.0724                                                                    | 0.0985                                                                    |

Equation \*  $R = \sum (F_o - F_c) / \sum (F_o)$  \*\*  $wR = \{ \sum [w(F_o^2 - F_c^2)^2] / \sum (F_o^2) \}^{1/2}$



**Table S-2** Selected bond lengths(Å) and angle (deg) of binuclear copper(II) complexes

| <b>Cu<sub>2</sub>L<sup>1</sup><sub>2</sub></b> |            |                 |            |
|------------------------------------------------|------------|-----------------|------------|
| Cu(1)-O(1)                                     | 1.928(5)   | Cu(1)-O(2)      | 1.932(6)   |
| Cu(1)-O(5)                                     | 1.978(6)   | Cu(1)-N(1)      | 1.969(6)   |
| Cu(2)-O(1)                                     | 1.918(5)   | Cu(2)-O(5)      | 1.965(5)   |
| Cu(2)-O(6)                                     | 1.944(6)   | Cu(2)-O(8)      | 2.307(6)   |
| Cu(2)-N(2)                                     | 1.966(6)   | Cu(2)-Cu(1)     | 2.993(19)  |
| O(1)-Cu(1)-O(2)                                | 176.2(2)   | O(1)-Cu(1)-O(5) | 78.9(2)    |
| O(2)-Cu(1)-O(5)                                | 103.3(2)   | O(1)-Cu(1)-N(1) | 93.2(2)    |
| O(2)-Cu(1)-N(1)                                | 84.7(3)    | O(5)-Cu(1)-N(1) | 172.0(3)   |
| O(1)-Cu(2)-O(1)                                | 91.5(2)    | O(1)-Cu(2)-O(5) | 80.1(2)    |
| O(1)-Cu(2)-O(6)                                | 98.1 (2)   | O(5)-Cu(2)-O(6) | 150.1(2)   |
| O(5)-Cu(2)-O(6)                                | 150.1(2)   | O(5)-Cu(2)-O(1) | 99.6(3)    |
| O(1)-Cu(2)-N(2)                                | 93.3(3)    | O(1)-Cu(2)-N(2) | 173.1(2)   |
| O(5)-Cu(2)-N(1)                                | 94.1(3)    | O(6)-Cu(2)-N(2) | 85.0(3)    |
| <b>Cu<sub>2</sub>L<sup>2</sup><sub>2</sub></b> |            |                 |            |
| Cu(1)-O(1)                                     | 1.943(3)   | Cu(2)-O(2)      | 1.930(3)   |
| Cu(1)-O(2)                                     | 1.955(3)   | Cu(2)-O(1)      | 1.940(3)   |
| Cu(1)-O6                                       | 1.927(3)   | Cu(2)-O(3)      | 1.906(3)   |
| Cu(1)-O(8)                                     | 2.345(3)   | Cu(2)-N(1)      | 1.968(4)   |
| Cu(1)-N(2)                                     | 1.998(4)   | Cu(1)-Cu(2)     | 3.001 (10) |
| O(2)-Cu(1)-O(8)                                | 106.12(14) | O6-Cu(1)-O(2)   | 100.07(14) |
| O(2)-Cu(1)-N(2)                                | 155.99(16) | O6-Cu(1)-O(1)   | 172.48(16) |
| O(1)-Cu(1)-O(2)                                | 77.10(13)  | O6-Cu(1)-O(8)   | 88.03(14)  |
| O(1)-Cu(1)-O(8)                                | 99.44(15)  | O6-Cu(1)-N(2)   | 85.64(15)  |
| O(1)-Cu(1)-N(2)                                | 94.22(14)  | N(2)-Cu(1)-O(8) | 97.32(14)  |
| O(2)-Cu(2)-O(1)                                | 77.76(13)  | O(3)-Cu(2)-O(2) | 175.41(17) |
| O(2)-Cu(2)-N(1)                                | 94.39(14)  | O(3)-Cu(2)-O(1) | 100.82(14) |
| O(1)-Cu(2)-N(1)                                | 168.61(17) | O(3)-Cu(2)-N(1) | 86.36(15)  |
| <b>Cu<sub>2</sub>L<sup>3</sup><sub>2</sub></b> |            |                 |            |
| Cu(1)-O(1)                                     | 1.928(5)   | Cu(1)-O(2)      | 1.911(6)   |
| Cu(1)-O(5)                                     | 1.925(5)   | Cu(1)-N(1)      | 1.972(6)   |
| Cu(2)-O(1)                                     | 1.965(5)   | Cu(2)-O(5)      | 1.943(5)   |
| Cu(2)-O(6)                                     | 1.945(6)   | Cu(2)-O(8)      | 2.335(6)   |
| Cu(2)-N(2)                                     | 1.995(6)   | Cu(2)-Cu(1)     | 3.008(16)  |
| O(1)-Cu(1)-O(2)                                | 176.5(3)   | O(1)-Cu(1)-O(5) | 78.0(2)    |
| O(2)-Cu(1)-O(5)                                | 101.9(2)   | O(1)-Cu(1)-N(1) | 93.5(2)    |
| O(2)-Cu(1)-N(1)                                | 86.1(2)    | O(5)-Cu(1)-N(1) | 168.49(3)  |
| O(1)-Cu(2)-O(5)                                | 76.7(2)    | O(1)-Cu(2)-O(6) | 100.1(2)   |
| O(1)-Cu(2)-O(8)                                | 107.2(2)   | O(5)-Cu(2)-O(6) | 172.6(3)   |
| O(5)-Cu(2)-O(8)                                | 99.0(2)    | O(6)-Cu(2)-O(8) | 88.3(2)    |
| O(1)-Cu(2)-N(2)                                | 155.3(3)   | O(5)-Cu(2)-N(2) | 94.5(2)    |
| O(6)-Cu(2)-N(2)                                | 85.8(2)    | O(8)-Cu(2)-N(2) | 96.9(2)    |

**Table S-3** Calculated Addison Tau factors ( $\tau$ ) and geometry for the central copper(II) of binuclear copper(II) complexes

| Catalyst                  | Cu(1)  |                         | Cu(2)  |                         |
|---------------------------|--------|-------------------------|--------|-------------------------|
|                           | $\tau$ | Geometrical shape       | $\tau$ | Geometrical shape       |
| $\text{Cu}_2\text{L}^1_2$ | 0.08   | octahedral              | 0.26   | distorted tetrahedral   |
| $\text{Cu}_2\text{L}^2_2$ | 0.22   | distorted tetrahedral   | 0.11   | distorted square planar |
| $\text{Cu}_2\text{L}^3_2$ | 0.11   | distorted square planar | 0.23   | distorted tetrahedral   |

**Table S-4** Calculated Mulliken charges of the two copper (II) centers of binuclear copper(II) complexes

| $\text{Cu}_2\text{L}^1_2$ |       | $\text{Cu}_2\text{L}^2_2$ |       | $\text{Cu}_2\text{L}^3_2$ |       |
|---------------------------|-------|---------------------------|-------|---------------------------|-------|
| Cu(1)                     | Cu(2) | Cu(1)                     | Cu(2) | Cu(1)                     | Cu(2) |
| 0.573                     | 0.569 | 0.576                     | 0.586 | 0.58                      | 0.581 |

**Table S-5** Relative activities of PNPP hydrolysis between various catalytic systems

| Catalyst                  | Relative Activity                                   |                                       |
|---------------------------|-----------------------------------------------------|---------------------------------------|
| None                      | CTAB/Buffer                                         |                                       |
|                           | 11.48                                               |                                       |
| $\text{Cu}_2\text{L}^1_2$ | $(\text{Cu}_2\text{L}^1_2+\text{CTAB})/\text{CTAB}$ | $\text{Cu}_2\text{L}^1_2/\text{CTAB}$ |
|                           | 1206                                                | 605.2                                 |
| $\text{Cu}_2\text{L}^2_2$ | $(\text{Cu}_2\text{L}^2_2+\text{CTAB})/\text{CTAB}$ | $\text{Cu}_2\text{L}^2_2/\text{CTAB}$ |
|                           | 1050                                                | 336.4                                 |
| $\text{Cu}_2\text{L}^3_2$ | $(\text{Cu}_2\text{L}^3_2+\text{CTAB})/\text{CTAB}$ | $\text{Cu}_2\text{L}^3_2/\text{CTAB}$ |
|                           | 1039                                                | 337.9                                 |
